# Supplementary material for: Age-related neuroinflammation and changes in AKT-GSK-3β and WNT/ β-CATENIN signaling in rat hippocampus
Source: publisher site journal article supplement (doi:10.18632/aging.100853), 2015-12-06
Supplement: Supplementary file [file aging-v7i12-100853-supplementary-material-SD1.pdf]

**SUPPLEMENTAL FIGURES**

**AKT 1** (Santa Cruz Biotechnology), M.W. ~ 60 KDa  
Spectra broad range protein ladder – Thermo Fischer

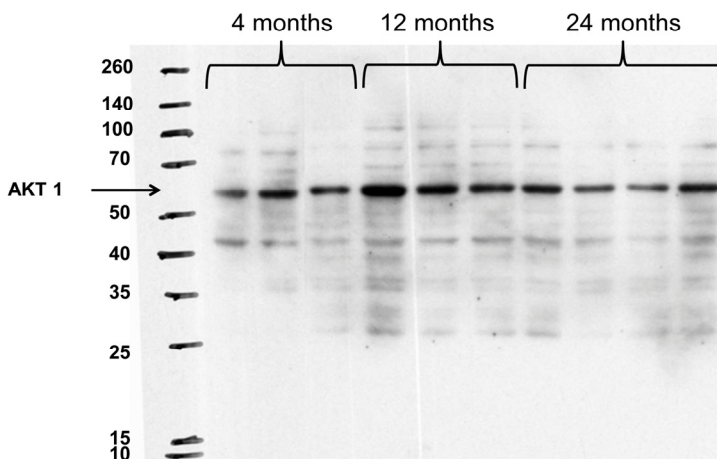

**Supplemental Figure 1.**

**pAKT1 (Ser 473)** (Sigma Aldrich), M.W. ~60 KDa.  
Spectra broad range protein ladder – Thermo Fischer

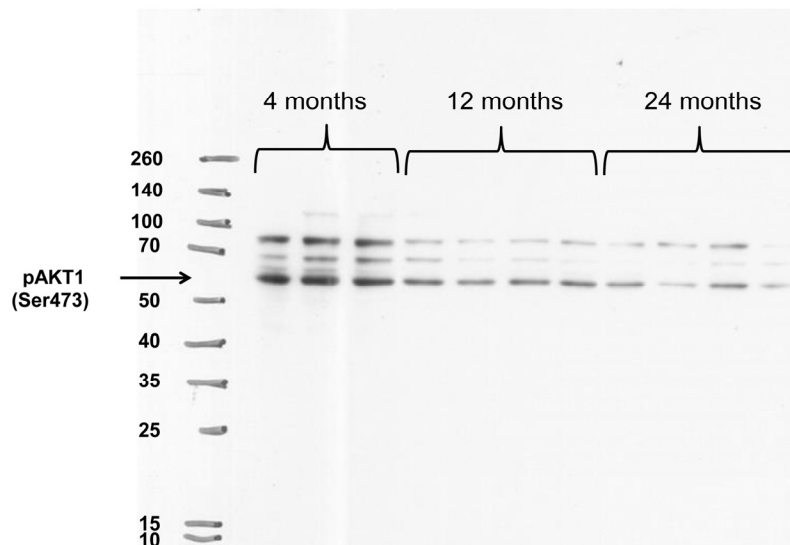

**Supplemental Figure 2.**

SeeBlue® Plus2 Pre-stained Protein Standard – Thermo Fischer

**pGSK-3 $\beta$  Ser 9 (Cell Signaling)**  
M.W. ~ 46 KDa

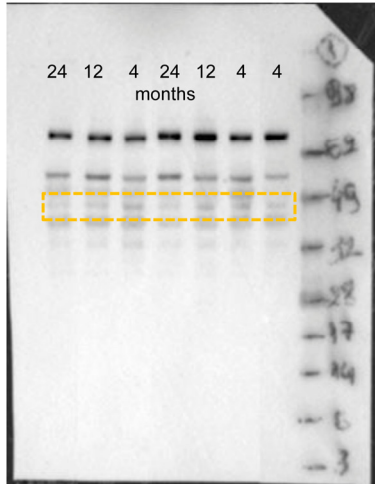

**GSK-3 $\beta$  (Cell Signaling) M.W. ~ 46 KDa**

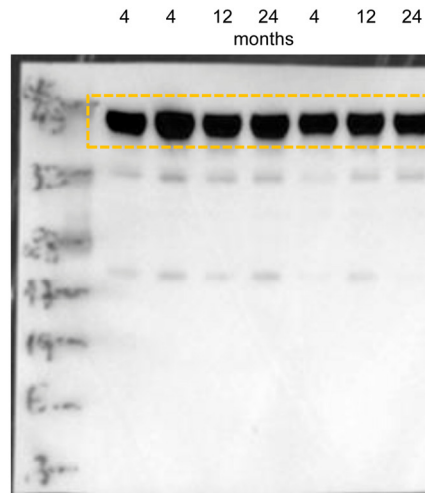

Supplemental Figure 3.

**$\beta$ -Catenin in Cytosol (Cell Signaling): M.W. ~92 Kda**  
Spectra broad range protein ladder  
(Thermo Fischer)

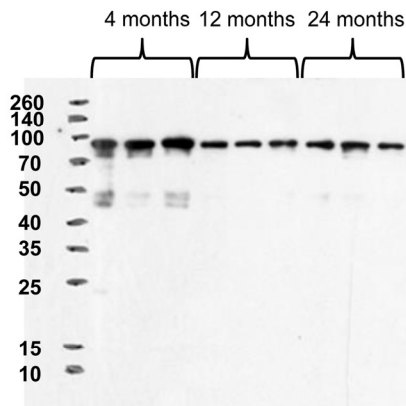

**phospho  $\beta$ -Catenin (Ser33/37/Thr41) (Cell Signaling): M.W. ~92 KDa**  
Spectra broad range protein ladder  
(Thermo Fischer)

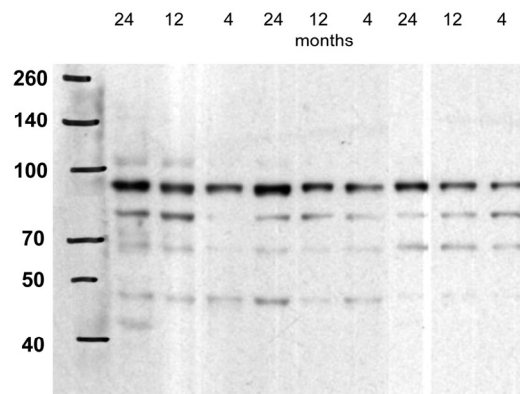

Supplemental Figure 4.

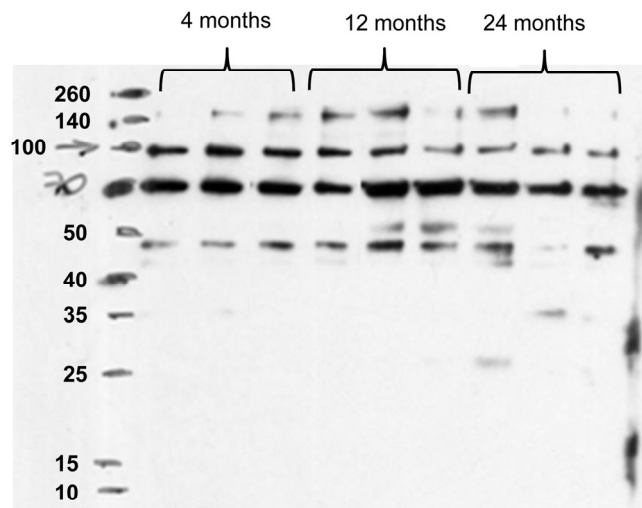

**Nuclear  $\beta$ -Catenin (Cell Signaling): M.W. ~92 Kda**  
Spectra broad range protein ladder (Thermo Fischer)

**Supplemental Figure 5.**

**Dvl-2 (Cell Signaling), M.W ~90-95**

HiMark™ Pre-stained Protein Standard, Thermo Fischer

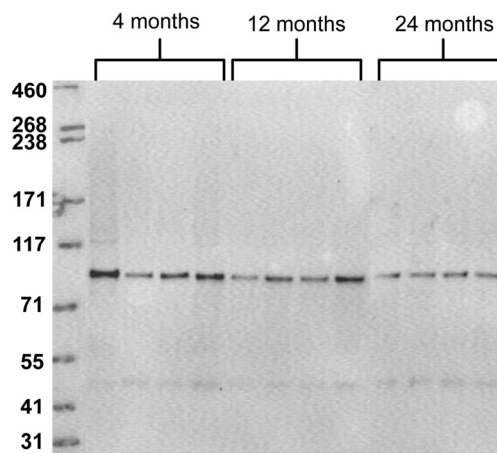

**Supplemental Figure 6.**
